# Supplementary material for: Trends and Progress in Neuroendovascular Treatment in Japan: Japanese Registry of Neuroendovascular Therapy (JR-NET) 4. Main Report
Source: PubMed Central journal article supplement — Neurol Med Chir (Tokyo). 2024 Jun 5;64(8):309–15. doi: 10.2176/jns-nmc.2024-0011 (PMC11374464; doi:10.2176/jns-nmc.2024-0011), 2024-06-05
Supplement: 1349-8029-64-8-0309-s001.pdf [file 1349-8029-64-8-0309-s001.pdf]

1 **Trends and Progress in Neuroendovascular Treatment in Japan: Japanese Registry of**  
2 **Neuroendovascular Therapy (JR-NET) 4. Main Report**

3  
4 **Appendix**

5 Participants, their hospitals, and the number of registered patients in JR-NET 4 are listed when  
6 >100 patients were registered; hospitals and names of investigators are listed when <100  
7 patients were registered.

8 Konan Hp, 1676; Matsumoto Y, Sato K, Yazawa Y, Shigematsu T, Kobe City General Hp,  
9 1478; Sakai N, Sakai C, Imamura H, Ohara N, Todo K, Sato S, Arimura K, Ueno T, Adachi H,  
10 Tani S, Kono T, Tokunaga S, Fukumitsu R, Beppu M, Funatsu T, Hoshi T, Omura Y, Sasaki N,  
11 Sunohara T, Fujiwara S, Murakami Y, Matsumoto S, Chihara H, Mineharu Y, Juntendo Univ,  
12 1331; Magami S, Oishi H, Tanoue S, Teranishi K, Hasegawa H, Nonaka S, Suga Y, Yamamoto  
13 M, Isozaki M, Iseki S, Yatomi K, Suzuki K, Sugiyama N, Inaka Y, Kitamura T, Mishima Y,  
14 Fujii T, Matsumoto T, Nishio A, Mitsuhashi T, Iwate Prefectural Central Hp, 1197; Kimura N,  
15 Sugawara T, Yokosawa M, Nagahata M, Yoshino Y, Ezura M, Takahashi T, Ogino T, Itabashi  
16 R, Kikuchi T, Sambongi Y, Takahashi K, Doijiri R, Suzuki K, Hyogo Med Univ, 1193;  
17 Kuramoto Y, Beppu M, Fukui K, Fukumoto S, Uchida K, Yoshimura S, Sakamoto D,  
18 Hashimoto T, Shirakawa M, Yamada K, Takagi T, Kakita H, Kuroda J, Shindo S, Kinjo N,  
19 Sugiura Y, Tatebayashi K, Nagao Y, Matsukawa H, NHO Sendai Med Ctr, 1170; Ezura M,  
20 Kitagawa N, Akiyama T, Sakata H, Kimura N, Kuramoto Y, Mohri M, Tsuboi K, Sato S,  
21 Shiroishi Memorial Hp, 1148; Yamada K, Nomura T, Omomo T, Yonemasu Y, Suzuki O,  
22 Nonaka T, Onda T, Kin S, Komatsu K, Kuribara T, Oishi H, Ota Memorial Hp, 1144; Ota S,  
23 Sekihara Y, Maeda K, Himeno T, Miyazaki T, Miyamoto M, Kambara M, National Cerebral  
24 and Cardiovascular Ctr, 1138; Satow T, Yamagami H, Sugata S, Kinkori T, Hayakawa M, Ito Y,  
25 Ishii D, Ikeno K, Ikeno K, Hara M, Ikedo T, Miyazaki Y, Hamano E, Higashida T, Funatsu N,  
26 Maruyama D, Yasuda R, Ishiguro T, Kouge J, Tone O, Tanaka S, Tanaka K, Chikuie H,

27 Hashimura N, Hara T, Yoshimoto T, Koiso T, Sumi M, Haboshi T, Dokkyo Univ Saitama Med  
28 Ctr, 1014; Hyodo A, Takigawa T, Nomura M, Takano I, Suzuki R, Kawamura Y, Sugiura Y,  
29 Nariai Y, Seijinkai Shimizu Hp, 1002; Shimizu F, Kuroiwa T, Uchida K, Shirakawa M, Kakita  
30 H, Sato K, Kuroda J, Beppu M, Yamashita T, Miki T, Shima S, Tsuji Y, Onishi Neurosurgical  
31 Hp, 978; Oonishi H, Takahashi K, Fukutome K, Maeoka R, Kurume Univ, 939; Hirohata M,  
32 Takeuchi Y, Orito K, Nakamura Y, Kajiwara S, Naito I, Tanoue S, Yamashita S, Himeno T,  
33 Aoki M, Miyachi S, Tsuboi K, Tanaka Y, Tanaka T, Yokosuka Kyosai Hp, 899; Maeda M,  
34 Watanabe M, Ogino E, Ayabe J, Nagoya Univ, 886; Izumi T, Hattori K, Koyama J, Irie K,  
35 Uemura A, Matsubara N, Nishihori M, Iwakami T, Tsukada T, Izumi T, Fukuoka Univ  
36 Chikushi Hp, 858; Tsuha M, Inoue R, Aikawa H, Kazekawa K, Nii K, Higashi T, Morinaga Y,  
37 Iko M, Kobayashi N, Kumagai K, Hiraoka F, Mitsutake T, Morinaga Y, Aimi Y, Matsumoto Y,  
38 NHO Nagoya Med Ctr, 827; Asai T, Shintai K, Takita W, Seijinkai Shimizu Hp, Gifu Univ,  
39 781; Enomoto Y, Miyachi S, Kokuzawa J, Srivatanakul K, Egashira Y, Takagi T, Tsujimoto M,  
40 Yamauchi K, Uematsu K, Matsubara H, Miyai M, Yamada T, Mizutani D, Shoda K,  
41 Toranomom Hp, 762; Watabe T, Tsuruta W, Asano T, Suda Y, Kanazawa R, Matsumaru Y,  
42 Ishihara S, Sato M, Kato Y, Kamiya Y, Honma T, Amano T, Hosoo H, Ota T, Murata T,  
43 Dofuku S, Horikawa H, Maruichi K, Miyauchi Y, Katsumata M, Kotsugi M, Tomio R, Nemoto  
44 T, Hino T, Fukuoka Univ, 759; Iwaasa M, Okawa M, Fukuda K, Takayama K, Higa T, Higashi  
45 T, Shimada R, Takemoto K, Yasuda M, Wakuta N, Fukumoto H, Horio Y, Nara Prefectural  
46 Medical Univ, 753; Park H, Wada T, Fukutome K, Nakagawa I, Takayama K, So G, Myochin  
47 K, Kotsugi M, Omoto K, Yokoyama S, Nakagawa H, Okayama Univ, 741; Sugi K, Mizuguchi  
48 A, Hishikawa T, Honma T, Hosogai M, Hiramatsu M, Kidani N, NHO Osaka Med Ctr, 733;  
49 Fujinaka T, Yamamoto S, Kono T, Kidani T, Sorimachi T, Isozumi T, Kijima N, Yamagami H,  
50 Tenri Yorozu Hp, 720; Akiyama Y, Fujimoto M, Yamana N, Takada S, Shitara S, Tokime T,  
51 Tanaka K, Sugita Y, Ogata H, Taguchi T, Tokyo Metropolitan Tama Medical Ctr, 669; Ota T,  
52 Matsumaru Y, Sato M, Amano T, Funatsu N, Ota K, Kanamaru H, Saito T, Tsuruta W, Kamiya

53 Y, Mori K, Tsuda K, Tokushima Red Cross Hp, 652; Satoh K, Hanaoka M, Kinouchi T,  
54 Yamamoto N, Shimada K, Tsukuba Univ, 641; Marushima A, Takigawa T, Hayakawa M,  
55 Matsumaru Y, Asakura F, Tsuruta W, Imamura H, Ito Y, Sato M, Hosoo H, Horita Y, Goto M,  
56 Tsuda K, Terakado T, Hino T, Matsumura H, Nakao J, Minamimoto S, Akimoto T, Kyoto Univ,  
57 631; Ishii A, Hasegawa H, Takenobu Y, Yoshida K, Uchida K, Oonishi H, Kikuchi T, Yamada  
58 K, Ando M, Miyakoshi A, Yamao Y, Ikeda H, Chihara H, Mineharu Y, Arai D, Komatsu K,  
59 Nishi H, Fukumitsu R, Torikoshi S, Hayashi K, Agawa Y, Abekura Y, Katano T, Nishida S,  
60 Adachi H, Oichi Y, Ono I, Tatsuya Y, Kochi Medical Ctr, 627; Ohta T, Fukuda M, Yagishita T,  
61 Masahira N, Ueba Y, Okada K, Matsuoka T, Okata T, Showa Univ, 627; Okumura H, Terada T,  
62 Imamura H, Enomoto Y, Matsumoto H, Kamiya Y, Nakajo T, Yoshioka H, Kuwajima A, Irie R,  
63 Hirose E, Tsunetoshi K, Niimi J, Kawasaki Med Univ, 609; Takai H, Mihara Memorial Hp,  
64 600; Aoki M, Akaji K, Katayama M, Saguchi T, Kano T, Kimura H, Akiyama T, Suzuki K,  
65 Takahashi S, Saito K, Takayama Y, Nakagawa Y, Mochiduki Y, Katano T, Kikuchi R, Aoki J,  
66 Tomio R, Kamamoto D, Nishimoto M, Tsukuba Med Ctr Hp, 599; Obata Y, Nishida A, Tsuruta  
67 W, Ito Y, Nakai Y, Ikeda G, Nakamura K, Terakado T, Konishi T, Nakao J, St Maria Hp, 592;  
68 Matsumoto Y, Takahashi K, Fukushima Y, Sato K, Sakai H, Tokyo Med Univ, 587; Nemoto S,  
69 Takahata H, Higuchi K, Yoshino Y, Sumita K, Inoue M, Miki K, Karakama J, Sakuta K, Indo  
70 M, Fujii S, Fujita K, Kyoto First Red Cross Hp, 574; Hamanaka M, Yamada T, Imai K, Toba T,  
71 Takegami T, Sato K, Tokuda N, Yamamoto A, Tsuto K, Goto Y, Yamaguchi Univ, 567;  
72 Ishihara H, Oka F, Nakatsuka M, Adachi H, Sadahiro H, Toyota S, Oku T, Nakashima K,  
73 Sugimoto K, Niimi Y, Kagawa Univ, 566; Akaji K, Kawaguchi K, Kawanishi M, Tenjin H,  
74 Yokouchi T, Shindo A, Hasegawa H, Hayashi N, Kawakita K, Yano T, Okauchi M, Takezawa  
75 M, Fujimori T, Shishido H, Kochi Univ, 557; Ueba Y, Fukui N, Masahira N, Higuchi K,  
76 Fukuda H, Fukuda M, Okawara M, Okada K, Kawanishi Y, Kyoto Prefectural Univ of  
77 Medicine, 557; Owada K, Nanto M, Inoue Y, Hirai M, Yamada T, Takado M, Tanigawa S,  
78 Goto Y, Yamamoto H, Funabashi Medical Ctr, 554; Naito H, Matsumaru Y, Sato M, Nemoto F,

79 Niimi J, Moriwaki T, Ise Red Cross Hp, 554; Shibata M, Sano T, Kobayashi K, Sato Y, Niigata  
80 Univ, 546; Ito Y, Nishino K, Hasegawa H, Morita K, Kikuchi B, Suzuki T, Fujiwara H,  
81 Motohashi K, Takahashi H, Ando K, Saito S, Shibuya K, Hiroshima Prefecture Hp, 542; Uchida  
82 K, Kondo H, Mizoue T, Mukai T, Magaki T, Kiura Y, Nagasaki Univ, 533; Horie N, Mie Univ,  
83 532; Toma N, Sakaida H, Yamamoto A, Sano T, Miura Y, Umeda Y, Shinohara T, Shiba M,  
84 Tanaka K, Nakatsuka Y, Yasuda R, Asada R, Kanamaru H, Tanioka S, Fujimoto M, Kagoshima  
85 City Hp, 524; Kubo F, Nishimuta Y, Tomosugi T, Fukuda M, Miyashita F, Komiyama M,  
86 Matsumoto Y, Tanaka S, Shigehatake Y, Sadamura Y, Inaka Y, Nagano Y, Kanazawa Univ,  
87 510; Uchiyama N, Misaki K, Mohri M, Kamide T, Yoshikawa A, Hirota Y, Ohno T, Hamada K,  
88 Osaka Neurosurgical Institute, 501; Nagashima M, Manaka H, Nishida T, Kajikawa R,  
89 Nakamura H, Yoshihara T, Asai K, Takano H, Tetsuya T, Ozaki T, Tateishi A, Tomita H,  
90 Maeda M, Murakami T, Izutsu N, Kawabata S, Osaka Medial and Dental Univ, 491; Hiramatsu  
91 R, Yagi R, Tsuji Y, Horiguchi S, Hiroshima Univ, 479; Kiura Y, Baba T, Okazaki T, Sakamoto  
92 S, Moroi J, Oshita J, Matsushige T, Mitsuhara T, Ishii D, Abiko M, Shinagawa K, Ichinose N,  
93 Seyama G, Kawanishi Y, Kuwabara M, Hokuto Hp, 472; Nishio A, Kuroiwa T, Kawakami T,  
94 Yamauchi S, Kobayashi N, Kondo K, Ikeda H, Takahashi K, Akita Cerebrospinal and  
95 Cardiovascular Ctr, 467; Kokubun K, Moroi J, Yoshioka S, Saito H, Tanabe J, Satomi J, Osaka  
96 Univ, 461; Sakaguchi M, Nishida T, Takagaki M, Todo K, Tohma Y, Nakamura H, Asai K,  
97 Ozaki T, Kadono Y, Murakami T, Kijima N, Takenaka T, Murase S, Izutsu N, Kawabata S,  
98 Matsui Y, Yamada S, Terada E, Tokai Univ, 460; Srivatanakul K, Furuichi M, Shimada A,  
99 Osada T, Aoki R, Shigematu H, Park H, Hirayama A, Fukui Red Cross Hp, 455; Hatano T,  
100 Hayase M, Miyakoshi A, Ikeda H, Taki J, Torikoshi S, Sano N, Toyama Univ, 449; Kobayashi  
101 J, Akioka N, Kashiwazaki D, Kojima T, Nakazawa T, Kuwayama N, Osaka Police Hp, 448;  
102 Aketa S, Kishi M, Fujimoto K, Inui T, Hachinohe Red Cross Hp, 446; Shibanai K, Konno H,  
103 Ueda R, Sakai C, Miyazaki Y, Suzuki K, Misaki T, Sugiu K, National Disaster Medical Ctr,  
104 444; Shigeta K, Yatsushige H, Enomoto M, Hirosaki Univ, 442; Shimamura N, Tottori Univ,

105 427; Kadowaki M, Kobayasi S, Takeuchi H, Hanakawa K, Uno T, Sakamoto M, Yoshioka H,  
106 Okayama City Hp, 422; Tokunaga K, Watanabe K, Sugiu K, Takayama K, Yoshino Y,  
107 Takasugi Y, Inoue S, Uchikawa H, Chiba Emergency Medical Ctr, 419; Kobayashi S,  
108 Yamamura A, Yasuda M, Koguchi Y, Shirato M, Yamauchi T, Suzuki K, Matsuura I, Daiyukai  
109 Hp, 414; Kato T, Sakai H, Hatano T, Yoshimura S, Ishiguro M, Inukai T, Fujimoto T,  
110 Tsujimoto M, Matsubara H, Aki T, Arai N, Osaka General Medical Ctr, 414; Fujimoto K,  
111 Sakaguchi M, Tamaki R, Inui T, Mori K, Yamaguchi R, Hoshi T, Horiuchi K, Ube Kosan  
112 Central Hp, 410; Ikeda N, Shiroyama Hp, 407; Muraio K, Miyake K, Morioka J, Eiraku N,  
113 National Ctr for Global Health and Medicine, 399; Inoue M, Nemoto S, Aishima K, Yoshino Y,  
114 Tamai Y, Fukuoka City Hp, 390; Fukushima Y, Nakagaki H, Orita Y, Shiga Med Univ, 388;  
115 NakazawaT, Tanaka T, Tsuji A, Yokoi T, Tsuji K, Shitara S, Miyata H, Yoshimura Y, Eishokai  
116 Yohida Hp, 384; Minami H, Yoshida Y, Sato E, Yokouchi T, Fukazawa S, Yamaura I, Masuda  
117 A, Maekawa H, Kakita H, Sakurai Y, Homma J, Hiyama N, Shitara S, Beppu M, Ono I, Omori  
118 Red Cross Hp, 381; Arakawa H, Takahashi A, Kaku S, Toho Univ Oosaki Hp, 381; , Hayashi  
119 M, Ohashi M, Takemura A, , Iwabuchi S, Tokyo Womens Med Univ, 379; Ishikawa T, Endo H,  
120 Funatsu T, Niimi Y, Iwakami T, Eguchi S, Showa Univ Koto Toyosaki Hp, 377; Kamiya Y,  
121 Terada T, Miyauchi Y, Yabuzaki H, Tanaka K, Sakamoto Y, Yamanashi Univ, 376; Kanemaru  
122 K, Hashimoto K, Yoshioka H, Arai N, Kyorin Univ, 370; Horikawa H, Amano T, Sato E,  
123 Ashida N, Sasamori H, Dembo T, Hyodo A, Kyoto Second Red Cross Hp, 370; Tanigawa S,  
124 Yamamoto H, Nanto M, Tenjin H, Murakami M, Hamanaka M, Maruyama D, Yazawa Y, Goto  
125 Y, Yamada T, Takado M, Kyusyu Univ, 353; Iihara K, Arimura K, Nishimura A, Ohba S, Iwaki  
126 K, Ido K, Kitano Hp, 352; Goto M, Matsumori Y, Taki J, Hayashi H, Sadahiro H, Hashikata H,  
127 Kuwana City General Hp, 345; Hamada K, Sakaida H, Nakatsuka Y, Yasuda M, Miura Y, Keio  
128 Univ, 340; Akiyama T, Niimi Y, Takahashi S, Nishimoto M, Maebashi Red Cross Hp, 340;  
129 Kano T, Ito Y, Naito I, Aihara M, Sato K, Yamaguchi R, Kagoshima K, Shimizu T, Miyamoto  
130 N, Matshuda Hp, 322; Nakahara T, Ogami R, Araki H, Yano T, Ichinose N, Shinrakuen Hp,

131 290; Ito Y, Kitazawa K, Kajikawa Hp, 286; Hirotsune N, Aihara H, Wakabayashi S, Ishii Y,  
132 Nakahara I, Suyama Y, Mizoue T, Kochi Red Cros Hp, 278; Matsushita N, Sogabe S, Satoh K,  
133 Tokushima Univ, 271; Haboshi T, Yamamoto Y, Korai M, Shimada K, Shigematu H, Ishihara  
134 M, Yamaguchi I, Sogabe S, Kinouchi T, Yamamoto N, Kanematsu Y, Kaneko J, Kato K,  
135 Yoshioka S, Satomi J, Sadato A, Nozaki T, Shizuoka Prefectural General Hp, 265; Arai D,  
136 Fujimoto M, Miyakoshi A, Ogakki Tokushukai Hp, 257; Hayashi K, Yoshimura S, Tanabe J,  
137 Kokuzawa J, Egashira Y, Yamashita K, Tsujimoto M, Yamada J, Miyai M, Fujioka General Hp,  
138 256; Wakabayashi K, Tomita Y, Naito I, Yoshizawa M, Tomita Y, Wakabayashi K, Nakamura  
139 Memorial Hp, 256; Ogino T, Endo H, Takao H, Shindo K, Tatsuta Y, Omuta City Hp, 249;  
140 Yamashita S, NHO Nagasaki Med Ctr, 246; Hiu T, Tohoku Univ, 240; Endo H, Shiba M,  
141 Niizuma K, Osawa S, Kitamura T, Yamashita K, Sakata H, Nakamura K, Morita T, Haryu S, Ito  
142 A, Nishijima Y, Ina Central Hp, 238; Koyama J, Sasaki T, Okinawa South Medical and  
143 Children Hp, 237; Takeshita T, Uji Tokushukai Hp, 229; Ogino E, Murai N, Ikeda H,  
144 Matsumoto H, Ishii A, Horikawa F, Nakano S, Miyakoshi A, Goda R, Kitahara T, Saitama  
145 medical Ctr, 225; Shojima M, Indo M, Saito A, Dembo T, Kagoshima Univ, 220; Tanaka S,  
146 Yonenaga M, Sugata S, Tamaki R, Ohta H, Matsumoto Y, Nagayama T, Kubo F, Hiwatari T,  
147 Fujita Med Univ, 216; Ssadato A, Ozaki S, Adachi K, Nakahara I, Tanabe J, Suzuki T,  
148 Watanabe S, Suyama K, Shikoku Medical Ctr for Children and Adults, 210; Sogabe S,  
149 Kanematsu Y, Kuwayama K, Korai M, Hagino H, Satoh K, Matsubara S, Satomi J, Koseiren  
150 Toride General Hp, 209; Kawano Y, Yokohama City Hp, 209; Masuo O, Umesaki A, Tetsuo Y,  
151 Kobe Univ, 204; Fujita A, Kota M, Saiki M, Ishii T, Tanaka J, Matsuo K, Sakata J, Kimitsu  
152 Central Hp, 202; Hayasaka M, Ebihara K, Tajima Y, Miyazaki Univ, 191; Ohta H, Yokogami K,  
153 Saito K, Ryu S, Mizuguchi A, Yamasaki K, Irisa G, Yokoyama T, Sakai City General Hp, 187;  
154 Kadono Y, Nishida T, Kajikawa R, Tateishi A, Ima H, JCHO Osaka Hp, 182; , Nakamura H,  
155 Shibano K, Yamagiwa H, Nagashima M, Tateishi A, Osaka Neurosurgical Hp, 170; Hayashi N,  
156 Kawanishi M, Shindo A, Yokohama City Univ, 170; Shimizu N, Suenaga J, Okayama Kyokuto

157 Hp, 168; Kawada S, Sugiu K, Sato D, Hiramatsu M, Shinaikai Tesseikai Hp, 168; Yamashita T,  
158 Yamada M, JCHO Oke Hp, 157; Kuawayama K, Furuno Y, Ioku T, Tokushima Prefectural Central  
159 Hp, 156; Tamura T, Yoshida K, Watari Y, Tachikawa General Hp, 154; Abe H, Jimbo Y,  
160 Takano H, Suzuki K, Nagoya Second Red Cross Hp, 153; Kojima T, Terai Y, Hattori K, Shintai  
161 K, Wakayama Red Cross Hp, 153; Tsuura M, Naito I, Higuchi K, Matsuda Y, Yoshimura R,  
162 Ohama Daiichi Hp, 152; Sawada K, Tomakomai Nissho Hp, 146; Kikuchi O, Wada H,  
163 Kitazawa K, Kobe Ekisaikai Hp, 145; Nakashima K, Okamoto S, Komai T, Mie Prefectural  
164 General Medical Ctr, 145; Umeda Y, Yamamoto A, Ioroi Y, Toma N, Saitama City Hp, 139;  
165 Kojima A, Sapporo Shuyukai Hp, 137; Kubota T, Fujiwara Y, Nagaoka Red Cross Hp, 136; Ito  
166 Y, Hasegawa H, Suzuki K, Jimbo Y, Tane General Hp, 135; Matsuzaki J, Yamada M, Yamada  
167 Y, Masubuchi T, Kyoto Katsura Hp, 130; Kawabata Y, Nakajima N, Inada T, Fukushima  
168 Prefectural Medical Univ, 124; Kojima T, Iwatate K, Oda K, Ichikawa T, Maeda T, Koto  
169 Memorial Hp, 118; Shitara S, Kitamura T, Akiyama Y, Tanaka T, Shitara S, Yoshimura Y,  
170 Kanazawa Medical Univ, 117; , Takata H, Takagi T, Shiraga S, Saitama Prefectural  
171 Cardiovascular and Respiratory Ctr, 115; Neki H, Tsukuba Memorial Hp, 104; Nakamura K,  
172 Sato M, Hayakawa M, Matsumaru Y, Nakai Y, Tsuruta W, Takigawa T, Ito Y, Marushima A,  
173 Kitami Red Cross Hp, 102; Mitsui N, Wada H, Imamura General Hp, 101; Shigehatake Y,  
174 Miyashita F, Kasuya J, Takebe N, Tanaka S, Nagayama T, Nagano Y, Nishimuta Y, Sugata S,  
175 Sadamura Y, Koseiren Saku Hp; Ochiai I, Kanazawa R, Yoshizawa M, Shimizu T, Naito I,  
176 Aihara M, Tomita Y, Yonezawa A, Yoshizawa M, Kohyama S, Fukui Saiseikai Hp; Takabatake  
177 Y, Uchiyama N, Tottori Prefectural Central Hp; Kiura Y, Sakamoto M, Takeuchi H, Kadowaki  
178 M, Tanaka K, Minamisoma City Hp, Kojima T, Oda K, Ichikawa T, Sato N, Koseiren  
179 Nishichita Hp; Moriya S, Toyama City Hp; Mohri M, Uchiyama N, Misaki K, Takamatsu Red  
180 Cross Hp; Kawanishi M, Okauchi M, Shindo A, Hayashi N, Miyakoshi A, Takezawa M,  
181 Kawakita K, Fujimori T, Tokushima City Hp; Kinouchi T, Koseiren Takaoka Hp; Arai M,  
182 Kubo M, Kuwayama N, Himeji Red Cross Hp; Takahashi K, Hiramatsu M, Sugiu K, Okuma Y,

183 Hirotsune N, ichinomiya Neurosurgical Hp; Hirohata M, Orito K, Nakamura Y, Tanoue S,  
184 Kubo T, Takeuchi Y, Sugita K, Ishikawa Prefectural Central Hp; Yoshikawa A, Mohri M,  
185 Misaki K, Kumagai T, Kamide T, Uchiyama N, Minamide H, Shinkoga Hp; Kameda K,  
186 Kashima Heart Clinic; Ohashi T, Yamamoto H, Morofuji Y, Matsunaga Y, Sadakata E, Iki Y,  
187 Imai T, Kanamoto T, Oita Almeida Memorial Hp; Goda M, Kubo T, Osaki City Hp; Yoshida M,  
188 Moriguchi Memorial Hp; Matsuzaki J, Hirosaki Stroke and Rehabilitation Hp; Goto Y, St  
189 Marianna Unic Toyoko Hp; Ueda T, Yoshie T, Saiseikai Futsukaichi Hp; , Hirohata M,  
190 Fujimura N, Fukuyama City Hp; Susgiu K, Hiramatsu M, Haruma J, Tokunaga K, Hishikawa T,  
191 Nakamura Memorial South Hp; Endo H, Nagatomi Neurosurgical Hp; Goto K, Hori Y, Kiyosue  
192 H, Okahara M
